# Supplementary material for: Benthic-pelagic coupling in the Barents Sea: an integrated data-model framework
Source: PubMed Central journal article supplement (PMC7481668; doi:10.1098/rsta.2019.0359), 2020-08-31
Supplement: rsta20190359supp1.pdf [file rsta20190359supp1.pdf]

*Electronic Supplementary Material*

Benthic-pelagic coupling in the Barents Sea: an integrated data-model  
framework

Felipe S. Freitas<sup>\*1,2</sup>, Katharine R. Hendry<sup>1</sup>, Sian F. Henley<sup>3</sup>, Johan C. Faust<sup>4</sup>, Allyson C. Tessin<sup>4,5</sup>, Mark A. Stevenson<sup>6</sup>, Geoffrey D. Abbott<sup>6</sup>, Christian März<sup>4</sup>, Sandra Arndt<sup>2</sup>

<http://dx.doi.org/10.1098/rsta.2019.0359>

<sup>1</sup> School of Earth Sciences, University of Bristol, Wills Memorial Building, Queen's Road, Bristol BS8 1RJ UK

<sup>2</sup> BGeosys, Department of Earth and Environmental Sciences, CP 160/02, Université Libre de Bruxelles, 1050 Brussels, Belgium

<sup>3</sup> School of GeoSciences, University of Edinburgh, James Hutton Road, Edinburgh EH9 3FE, UK

<sup>4</sup> School of Earth & Environment, University of Leeds, Leeds LS2 9JT, UK

<sup>5</sup> Department of Geology, Kent State University, Kent, OH, 4424, USA

<sup>6</sup> School of Natural and Environmental Sciences, Drummond Building, Newcastle University, Newcastle upon Tyne NE1 7RU, UK

\* Corresponding author: [felipe.salesdefreitas@bristol.ac.uk](mailto:felipe.salesdefreitas@bristol.ac.uk)

Table S1. Reaction network implemented in the organic matter degradation model for the Barents Sea [1,2].

| Reaction                         | Pathway                                                                  |
|----------------------------------|--------------------------------------------------------------------------|
| <i>Primary redox reactions</i>   |                                                                          |
| $r_1$                            | <i>Aerobic respiration</i>                                               |
| $r_2$                            | <i>Denitrification</i>                                                   |
| $r_3$                            | <i>HR Manganese reduction</i>                                            |
| $r_4$                            | <i>HR Iron reduction</i>                                                 |
| $r_5$                            | <i>Organoclastic sulfate reduction</i>                                   |
| $r_6$                            | <i>Methanogenesis</i>                                                    |
| <i>Secondary redox reactions</i> |                                                                          |
| $r_7$                            | <i>Nitrification</i>                                                     |
| $r_8$                            | <i>Manganese reoxidation by oxygen</i>                                   |
| $r_9$                            | <i>Iron reoxidation by HR manganese</i>                                  |
| $r_{10}$                         | <i>Iron reoxidation by PR manganese</i>                                  |
| $r_{11}$                         | <i>Iron reoxidation by oxygen</i>                                        |
| $r_{12}$                         | <i>Sulfide oxidation by oxygen</i>                                       |
| $r_{13}$                         | <i>Sulfide oxidation by HR manganese</i>                                 |
| $r_{14}$                         | <i>Sulfide oxidation by PR manganese</i>                                 |
| $r_{15}$                         | <i>Sulfide oxidation by HR iron</i>                                      |
| $r_{16}$                         | <i>Sulfide oxidation by MR iron</i>                                      |
| $r_{17}$                         | <i>Sulfide oxidation by PR iron</i>                                      |
| $r_{18}$                         | <i>Anaerobic oxidation of methane (AOM) coupled to sulfate reduction</i> |
| $r_{19}$                         | <i>Methane oxidation by oxygen</i>                                       |
| $r_{20}$                         | <i>Iron sulfide oxidation by oxygen</i>                                  |
| <i>Other reactions</i>           |                                                                          |
| $r_{21}$                         | <i>HR Mn ageing</i>                                                      |
| $r_{22}$                         | <i>HR Fe ageing</i>                                                      |

HR (Highly Reactive); MR (Moderately Reactive); (PR) Poorly Reactive

Table S2. Stoichiometry and reaction rates implemented in the organic matter degradation model for the Barents Sea [1,2].

|                                  | Stoichiometry                                                                                                                                                                                                                                        | Reaction rate                                                    |
|----------------------------------|------------------------------------------------------------------------------------------------------------------------------------------------------------------------------------------------------------------------------------------------------|------------------------------------------------------------------|
| <i>Primary redox reactions</i>   |                                                                                                                                                                                                                                                      |                                                                  |
| $r_1$                            | $(CH_2O)_x(NH_3)_y(H_3PO_4)_z + (x + 2y)O_2 + (y + 2z)HCO_3^- \rightarrow (x + y + 2z)CO_2 + yNH_4^+ + zHPO_4^{2-} + (x + 2y + 2z)H_2O$                                                                                                              | $r_1 = v \cdot (a + age)^{-1} \cdot CH_2O \cdot f_{O_2}$         |
| $r_2$                            | $(CH_2O)_x(NH_3)_y(H_3PO_4)_z + \left(\frac{4x+3y}{5}\right)NO_3^- \rightarrow \left(\frac{2x+4y}{5}\right)N_2 + \left(\frac{x-3y+10z}{5}\right)CO_2 + \left(\frac{4x+3y-10z}{5}\right)HCO_3^- + zHPO_4^{2-} + \left(\frac{3x+6y+10z}{5}\right)H_2O$ | $r_2 = v \cdot (a + age)^{-1} \cdot CH_2O \cdot f_{NO_3}$        |
| $r_3$                            | $(CH_2O)_x(NH_3)_y(H_3PO_4)_z + 2x HR MnO_2 + (3x + y - 2z)CO_2 + (x + y - 2z)H_2O \rightarrow 2xMn^{2+} + (4x + y - 2z)HCO_3^- + yNH_4^+ + HPO_4^{2-}$                                                                                              | $r_3 = v \cdot (a + age)^{-1} \cdot CH_2O \cdot f_{HR MnO_2}$    |
| $r_4$                            | $(CH_2O)_x(NH_3)_y(H_3PO_4)_z + 4x HR Fe(OH)_3 + (7x + y - 2z)CO_2 \rightarrow 4xFe^{2+} + (8x + y - 2z)HCO_3^- + yNH_4^+ + zHPO_4^{2-} + (3x - y + 2z)H_2O$                                                                                         | $r_4 = v \cdot (a + age)^{-1} \cdot CH_2O \cdot f_{HR Fe(OH)_3}$ |
| $r_5$                            | $(CH_2O)_x(NH_3)_y(H_3PO_4)_z + \frac{x}{2}SO_4^{2-} + (y - 2z)CO_2 + (y - 2z)H_2O \rightarrow \frac{x}{2}H_2S + (x + y - 2z)HCO_3^- + yNH_4^+ + zHPO_4^{2-}$                                                                                        | $r_5 = v \cdot (a + age)^{-1} \cdot CH_2O \cdot f_{SO_4^{2-}}$   |
| $r_6$                            | $(CH_2O)_x(NH_3)_y(H_3PO_4)_z + (y - 2z)H_2O \rightarrow \left(\frac{x-2y+4z}{2}\right)CO_2 + (y - 2z)HCO_3^- + yNH_4^+ + zHPO_4^{2-} + \frac{x}{2}CH_4$                                                                                             | $r_6 = v \cdot (a + age)^{-1} \cdot CH_2O \cdot f_{CH_4}$        |
| <i>Secondary redox reactions</i> |                                                                                                                                                                                                                                                      |                                                                  |
| $r_7$                            | $NH_4^+ + 2O_2 + 2HCO_3^- \rightarrow NO_3^- + 2CO_2 + 3H_2O$                                                                                                                                                                                        | $r_7 = k_7 \cdot NH_4^+ \cdot O_2$                               |
| $r_8$                            | $Mn^{2+} + \frac{1}{2}O_2 + 2HCO_3^- \rightarrow HR MnO_2 + 2CO_2 + H_2O$                                                                                                                                                                            | $r_8 = k_8 \cdot Mn^{2+} \cdot O_2$                              |
| $r_9$                            | $2Fe^{2+} + HR MnO_2 + 2HCO_3^- + 2H_2O \rightarrow 2 HR Fe(OH)_3 + Mn^{2+} + 2CO_2$                                                                                                                                                                 | $r_9 = k_9 \cdot Fe^{2+} \cdot HR MnO_2$                         |
| $r_{10}$                         | $2Fe^{2+} + PR MnO_2 + 2HCO_3^- + 2H_2O \rightarrow 2 HR Fe(OH)_3 + Mn^{2+} + 2CO_2$                                                                                                                                                                 | $r_{10} = k_{10} \cdot Fe^{2+} \cdot PR MnO_2$                   |
| $r_{11}$                         | $Fe^{2+} + \frac{1}{4}O_2 + 2HCO_3^- + \frac{1}{2}H_2O \rightarrow HR Fe(OH)_3 + 2CO_2$                                                                                                                                                              | $r_{11} = k_{11} \cdot Fe^{2+} \cdot O_2$                        |
| $r_{12}$                         | $H_2S + 2O_2 + 2HCO_3^- \rightarrow SO_4^{2-} + 2CO_2 + 2H_2O$                                                                                                                                                                                       | $r_{12} = k_{12} \cdot (HS^- + H_2S) \cdot O_2$                  |
| $r_{13}$                         | $H_2S + HR MnO_2 + 2CO_2 \rightarrow Mn^{2+} + S^0 + 2HCO_3^-$                                                                                                                                                                                       | $r_{13} = k_{13} \cdot (HS^- + H_2S) \cdot HR MnO_2$             |
| $r_{14}$                         | $H_2S + PR MnO_2 + 2CO_2 \rightarrow Mn^{2+} + S^0 + 2HCO_3^-$                                                                                                                                                                                       | $r_{14} = k_{14} \cdot (HS^- + H_2S) \cdot HR MnO_2$             |
| $r_{15}$                         | $H_2S + 2 HR Fe(OH)_3 + 4CO_2 \rightarrow 2Fe^{2+} + S^0 + 4HCO_3^- + H_2O$                                                                                                                                                                          | $r_{15} = k_{15} \cdot (HS^- + H_2S) \cdot HR Fe(OH)_3$          |
| $r_{16}$                         | $H_2S + 2 MR Fe(OH)_3 + 4CO_2 \rightarrow 2Fe^{2+} + S^0 + 4HCO_3^- + H_2O$                                                                                                                                                                          | $r_{16} = k_{16} \cdot (HS^- + H_2S) \cdot MR Fe(OH)_3$          |
| $r_{17}$                         | $H_2S + 2 PR Fe(OH)_3 + 4CO_2 \rightarrow 2Fe^{2+} + S^0 + 4HCO_3^- + H_2O$                                                                                                                                                                          | $r_{17} = k_{17} \cdot (HS^- + H_2S) \cdot PR Fe(OH)_3$          |
| $r_{18}$                         | $CH_4 + CO_2 + SO_4^{2-} \rightarrow 2HCO_3^- + H_2S$                                                                                                                                                                                                | $r_{18} = k_{18} \cdot CH_4 \cdot SO_4^{2-}$                     |
| $r_{19}$                         | $CH_4 + 2O_2 \rightarrow CO_2 + 2H_2O$                                                                                                                                                                                                               | $r_{19} = k_{19} \cdot CH_4 \cdot O_2$                           |
| $r_{20}$                         | $FeS + O_2 \rightarrow Fe^{2+}SO_4^{2-}$                                                                                                                                                                                                             | $r_{20} = k_{20} \cdot FeS \cdot O_2$                            |
| <i>Other reactions</i>           |                                                                                                                                                                                                                                                      |                                                                  |
| $r_{21}$                         | $HR MnO_2 \rightarrow PR MnO_2$                                                                                                                                                                                                                      | $r_{21} = k_{21} \cdot HR MnO_2$                                 |
| $r_{22}$                         | $HR Fe(OH)_3 \rightarrow MR Fe(OH)_3$                                                                                                                                                                                                                | $r_{22} = k_{22} \cdot HR Fe(OH)_3$                              |

Table S3. General model parameters implemented in the organic matter degradation model for the Barents Sea.

| Parameter                                        | Unit              | Value                            | Reference                 |                     |
|--------------------------------------------------|-------------------|----------------------------------|---------------------------|---------------------|
| <i>Transport parameters</i>                      |                   |                                  |                           |                     |
| Length of model domain                           | $L$               | cm                               | 100                       | <i>This study</i>   |
| Bioirrigation coefficient                        | $a_0$             | yr <sup>-1</sup>                 | 10                        | [2]                 |
| Bioirrigation attenuation depth                  | $x_{irri}$        | cm                               | 3.5                       | [2]                 |
| Oxygen molecular diffusion coefficient           | $D_{O_2}$         | cm <sup>2</sup> yr <sup>-1</sup> | 380.44                    | [3]                 |
| Nitrate molecular diffusion coefficient          | $D_{NO_3^-}$      | cm <sup>2</sup> yr <sup>-1</sup> | 394.58                    | [3]                 |
| Sulfate molecular diffusion coefficient          | $D_{SO_4^{2-}}$   | cm <sup>2</sup> yr <sup>-1</sup> | 173.92                    | [3]                 |
| Ammonium molecular diffusion coefficient         | $D_{NH_4^+}$      | cm <sup>2</sup> yr <sup>-1</sup> | 395.87                    | [3]                 |
| Phosphate molecular diffusion coefficient        | $D_{PO_4^{3-}}$   | cm <sup>2</sup> yr <sup>-1</sup> | 112.35                    | [3]                 |
| Manganese molecular diffusion coefficient        | $D_{Mn^{2+}}$     | cm <sup>2</sup> yr <sup>-1</sup> | 123.38                    | [3]                 |
| Iron molecular diffusion coefficient             | $D_{Fe^{2+}}$     | cm <sup>2</sup> yr <sup>-1</sup> | 136.24                    | [3]                 |
| Hydrogen sulfide molecular diffusion coefficient | $D_{H_2S}$        | cm <sup>2</sup> yr <sup>-1</sup> | 331.61                    | [3]                 |
| Porosity                                         | $\phi$            | –                                | <i>Site-specific</i>      | <i>See table S4</i> |
| Bioturbation coefficient                         | $D_{bio}$         | cm <sup>2</sup> yr <sup>-1</sup> | <i>Site-specific</i>      | <i>See table S4</i> |
| Bioturbation depth                               | $z_{bio}$         | cm                               | <i>Site-specific</i>      | <i>See table S4</i> |
| Sedimentation rate                               | $\omega$          | cm yr <sup>-1</sup>              | <i>Site-specific</i>      | <i>See table S4</i> |
| <i>Reaction parameters</i>                       |                   |                                  |                           |                     |
| Stoichiometry constants                          | $x/y/z$           | –                                | 106/12/1                  | [2]                 |
| OM Scaling parameter                             | $v$               | –                                | <i>variable</i>           | [4]                 |
| OM Shaping parameter                             | $a$               | yr                               | <i>variable</i>           | [4]                 |
| OM reactivity – multi-G                          | $k_{MG}$          | yr <sup>-1</sup>                 | $10^{-15} - -\log(a) + 2$ | <i>This study</i>   |
| OM age                                           | $age$             | yr                               | <i>variable</i>           | [5]                 |
| Oxygen half-saturation constant                  | $K_{O_2}$         | M                                | $8.0 \cdot 10^{-9}$       | [3]                 |
| Nitrate half-saturation constant                 | $K_{NO_3^-}$      | M                                | $5.0 \cdot 10^{-9}$       | [3]                 |
| Manganese half-saturation constant               | $K_{HR MnO_2}$    | M                                | $5.0 \cdot 10^{-6}$       | [3]                 |
| Iron half-saturation constant                    | $K_{HR Fe(OH)_3}$ | M                                | $1.25 \cdot 10^{-5}$      | [3]                 |
| Sulfate half-saturation constant                 | $K_{SO_4^{2-}}$   | M                                | $1.0 \cdot 10^{-7}$       | [3]                 |

Table S4. Site-specific transport parameters adopted at each studied location along a 30°E S–N transect in the Barents Sea.

| <b>Parameter</b>                     | <b>Unit</b>        | <b>B13</b>                   | <b>B14</b> | <b>B15</b> | <b>B16</b> | <b>B17</b> |      |
|--------------------------------------|--------------------|------------------------------|------------|------------|------------|------------|------|
| Porosity at sediment-water interface | $\varphi$          | –                            | 0.89       | 0.91       | 0.92       | 0.82       | 0.82 |
| Porosity at depth                    | $\varphi_{\infty}$ | –                            | 0.62       | 0.71       | 0.62       | 0.50       | 0.62 |
| Porosity attenuation                 | $\varphi_{att}$    | –                            | 0.15       | 0.18       | 0.10       | 0.10       | 0.10 |
| Bioturbation coefficient             | $D_{bio}$ [6]      | $\text{cm}^2 \text{yr}^{-1}$ | 6.0        | 4.0        | 2.0        | 2.5        | 2.0  |
| Bioturbation depth                   | $z_{bio}$ [6]      | cm                           | 2          | 4          | 5          | 5          | 4    |
| Sedimentation rate                   | $\omega$ [7]       | $\text{cm yr}^{-1}$          | 0.05       | 0.05       | 0.06       | 0.05       | 0.05 |
| Temperature                          | $T$ [8]            | °C                           | 1.76       | 1.94       | –1.50      | –1.45      | 1.75 |
| Salinity                             | $S$ [8]            | –                            | 35         | 35         | 35         | 35         | 35   |
| Water depth                          | $h$ [8]            | m                            | 355        | 290        | 330        | 294        | 291  |

Table S5. Site-specific reaction parameters determined in this study for each studied location along a 30°E S–N transect in the Barents Sea. Parameters correspond to reaction network outlined in Table S1 and Table S2.

| <b>Parameter</b> | <b>Unit</b>      | <b>B13</b>          | <b>B14</b>          | <b>B15</b>          | <b>B16</b>          | <b>B17</b>          |
|------------------|------------------|---------------------|---------------------|---------------------|---------------------|---------------------|
| $k_7$            | $M^{-1} yr^{-1}$ | $1.5 \cdot 10^7$    | $1.5 \cdot 10^7$    | $1.5 \cdot 10^{11}$ | $1.5 \cdot 10^9$    | $1.5 \cdot 10^{10}$ |
| $k_8$            | $M^{-1} yr^{-1}$ | $2.0 \cdot 10^8$    | $2.0 \cdot 10^8$    | $2.0 \cdot 10^8$    | $2.0 \cdot 10^9$    | $2.0 \cdot 10^{10}$ |
| $k_9$            | $M^{-1} yr^{-1}$ | $2.0 \cdot 10^3$    | $2.0 \cdot 10^3$    | $2.0 \cdot 10^3$    | $2.0 \cdot 10^3$    | $2.0 \cdot 10^3$    |
| $k_{10}$         | $M^{-1} yr^{-1}$ | $2.0 \cdot 10^4$    | $2.0 \cdot 10^4$    | $2.0 \cdot 10^3$    | $2.0 \cdot 10^3$    | $2.0 \cdot 10^3$    |
| $k_{11}$         | $M^{-1} yr^{-1}$ | $1.0 \cdot 10^9$    | $1.0 \cdot 10^9$    | $1.0 \cdot 10^{10}$ | $1.0 \cdot 10^9$    | $1.0 \cdot 10^9$    |
| $k_{12}$         | $M^{-1} yr^{-1}$ | $1.0 \cdot 10^9$    | $1.0 \cdot 10^9$    | $1.0 \cdot 10^9$    | $1.0 \cdot 10^9$    | $1.0 \cdot 10^9$    |
| $k_{13}$         | $M^{-1} yr^{-1}$ | $1.0 \cdot 10^7$    | $1.0 \cdot 10^7$    | $1.0 \cdot 10^7$    | $1.0 \cdot 10^7$    | $1.0 \cdot 10^7$    |
| $k_{14}$         | $M^{-1} yr^{-1}$ | $1.0 \cdot 10^4$    | $1.0 \cdot 10^4$    | $1.0 \cdot 10^4$    | $1.0 \cdot 10^4$    | $1.0 \cdot 10^4$    |
| $k_{15}$         | $M^{-1} yr^{-1}$ | $1.0 \cdot 10^7$    | $1.0 \cdot 10^7$    | $1.0 \cdot 10^7$    | $1.0 \cdot 10^7$    | $1.0 \cdot 10^7$    |
| $k_{16}$         | $M^{-1} yr^{-1}$ | $1.0 \cdot 10^6$    | $1.0 \cdot 10^6$    | $1.0 \cdot 10^6$    | $1.0 \cdot 10^6$    | $1.0 \cdot 10^6$    |
| $k_{17}$         | $M^{-1} yr^{-1}$ | $1.0 \cdot 10^3$    | $1.0 \cdot 10^3$    | $1.0 \cdot 10^3$    | $1.0 \cdot 10^3$    | $1.0 \cdot 10^3$    |
| $k_{18}$         | $M^{-1} yr^{-1}$ | $5.0 \cdot 10^6$    | $5.0 \cdot 10^6$    | $5.0 \cdot 10^6$    | $5.0 \cdot 10^6$    | $5.0 \cdot 10^6$    |
| $k_{19}$         | $M^{-1} yr^{-1}$ | $1.0 \cdot 10^{13}$ | $1.0 \cdot 10^{13}$ | $1.0 \cdot 10^{13}$ | $1.0 \cdot 10^{13}$ | $1.0 \cdot 10^{13}$ |
| $k_{20}$         | $M^{-1} yr^{-1}$ | $1.0 \cdot 10^9$    | $1.0 \cdot 10^9$    | $1.0 \cdot 10^9$    | $1.0 \cdot 10^9$    | $1.0 \cdot 10^9$    |
| $k_{21}$         | $M^{-1} yr^{-1}$ | $6.0 \cdot 10^{-1}$ | $6.0 \cdot 10^{-1}$ | $6.0 \cdot 10^{-1}$ | $6.0 \cdot 10^{-1}$ | $6.0 \cdot 10^{-1}$ |
| $k_{22}$         | $M^{-1} yr^{-1}$ | $6.0 \cdot 10^{-1}$ | $6.0 \cdot 10^{-1}$ | $6.0 \cdot 10^{-1}$ | $6.0 \cdot 10^{-1}$ | $6.0 \cdot 10^{-1}$ |

Table S6. Model-derived relative contributions of each metabolic pathway to total rates of heterotrophic organic matter degradation.

| Site | Aerobic respiration<br>% | Denitrification<br>% | Manganese reduction<br>% | Iron reduction<br>% | Sulfate reduction<br>% |
|------|--------------------------|----------------------|--------------------------|---------------------|------------------------|
| B13  | 64.1                     | 4.2                  | 0.5                      | 0.5                 | 30.8                   |
| B14  | 52.6                     | 8.3                  | 7.3                      | 3.1                 | 28.7                   |
| B15  | 52.9                     | 11.6                 | 0.01                     | 0.4                 | 35.1                   |
| B16  | 74.6                     | 3.8                  | 2.9                      | 0.4                 | 18.2                   |
| B17  | 43.6                     | 8.2                  | 17.0                     | 0.8                 | 30.4                   |

Table S7. Model-derived relative contributions of each transport pathway to total ammonium and phosphate benthic fluxes across the sediment-water interface.

| Site | Ammonium – $J_{NH_4}$ |                   |                    |                | Phosphate – $J_{PO_4}$ |                   |                    |                |
|------|-----------------------|-------------------|--------------------|----------------|------------------------|-------------------|--------------------|----------------|
|      | Diffusion<br>%        | Bioturbation<br>% | Bioirrigation<br>% | Advection<br>% | Diffusion<br>%         | Bioturbation<br>% | Bioirrigation<br>% | Advection<br>% |
| B13  | 59.2                  | 1.1               | 39.7               | <0.01          | 90.1                   | 5.9               | 4.0                | <0.01          |
| B14  | 92.9                  | 1.1               | 6.0                | <0.01          | 94.3                   | 3.9               | 1.8                | <0.01          |
| B15  | 31.2                  | 0.2               | 68.6               | <0.01          | 90.7                   | 2.2               | 7.1                | <0.01          |
| B16  | 76.8                  | 0.8               | 22.4               | <0.01          | 93.4                   | 3.4               | 3.2                | <0.01          |
| B17  | 82.8                  | 0.6               | 16.6               | <0.01          | 94.8                   | 2.4               | 2.9                | <0.01          |



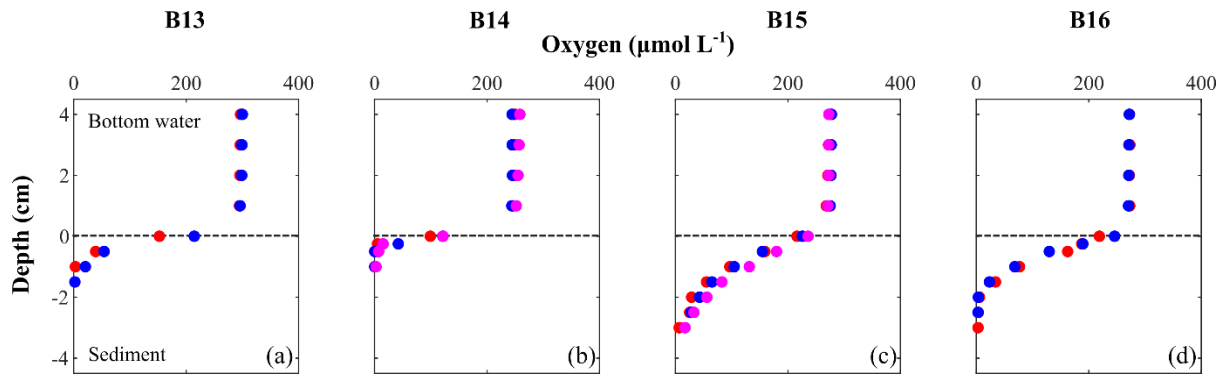

Figure S1. Oxygen concentration profiles measured in bottom waters and sediments along the 30°E S–N transect in the Barents Sea in July 2019 (*RRS James Clark Ross – JR18006*) [9]. Profiles were determined in 2–3 intact cores containing visually undisturbed bottom water and surface sediments from independent megacorer deployments (coloured dots) at each station. Depth profiles measured direct from cores using a *FireSting O2-Mini sensor* (*Pyro Science*) mounted on a plastic support with a mobile arm which allowed data acquisition at 0.5–1.0 cm scale. Dashed line represents the sediment-water interface. No data available at B17 since this station was inaccessible at the time of sampling.

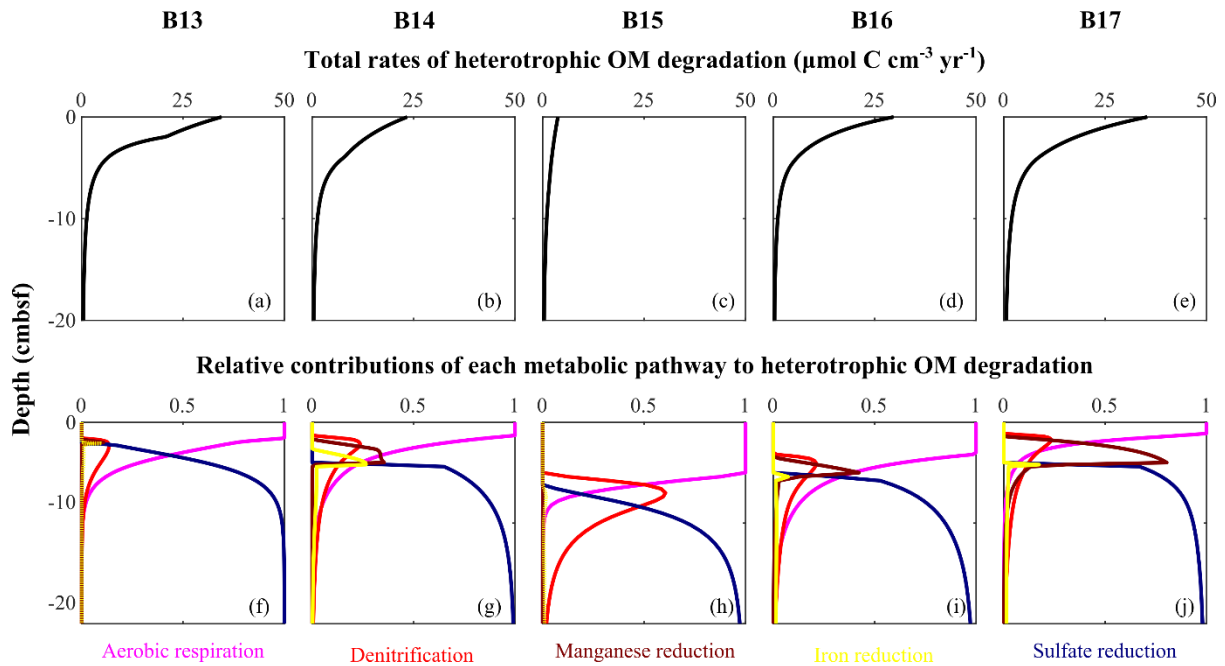

Figure S2. Depth evolution of heterotrophic organic matter degradation rates along the 30°E S–N transect in the Barents Sea. Rates are calculated assuming steady-state conditions and are derived from the primary redox reactions in Table S1 and S2. The top row (a–e) shows the depth profiles of total rates of degradation, and the bottom row (f–j) displays the depth evolution of relative contribution for each respiration pathway.

Table S8. Measured downcore concentration profiles used to inform the data-model fitting at site B13 (cruise JR16006 – July 2017).

| Event | Depth<br>cmbsf | Porewater           |                     |                        |                      |                      | Event | Depth<br>cmbsf | Sediment          |                   |
|-------|----------------|---------------------|---------------------|------------------------|----------------------|----------------------|-------|----------------|-------------------|-------------------|
|       |                | $NO_3^-$<br>$\mu M$ | $NH_4^+$<br>$\mu M$ | $PO_4^{3-}$<br>$\mu M$ | $Mn^{2+}$<br>$\mu M$ | $Fe^{2+}$<br>$\mu M$ |       |                | $TOC$ (R1)<br>wt% | $TOC$ (R2)<br>wt% |
| E101  | 0.5            | 12.8                | 2.1                 | 1.2                    | 0.0                  | 0.0                  | E101  | 0.25           | 2.25              | 2.201             |
|       | 1.5            | 11.9                | 2.3                 | 1.3                    | 0.0                  | 0.0                  |       | 0.75           | 2.061             | 2.002             |
|       | 2.5            | 6.6                 | 9.4                 | 1.2                    | 1.1                  | 9.8                  |       | 1.25           | 1.935             | 1.984             |
|       | 4.5            | 0.9                 | 30.1                | 1.2                    | 1.9                  | 56.2                 |       | 1.75           | 1.874             |                   |
|       | 6.5            | 0.6                 | 32.6                | 1.1                    | 1.3                  | 27.8                 |       | 2.5            | 1.829             | 1.946             |
|       | 8.5            | 0.8                 | 39.6                | 2.0                    | 1.6                  | 26.1                 |       | 3.5            | 1.975             | 1.908             |
|       | 10.5           | 1.9                 | 24.8                | 1.2                    | 2.3                  | 26.6                 |       | 4.5            |                   | 1.904             |
|       | 12.5           | 0.7                 | 30.5                | 2.6                    | 3.4                  | 52.8                 |       | 5.5            | 1.898             | 1.917             |
|       | 14.5           | 0.9                 | 29.7                | 0.7                    | 3.2                  | 50.6                 |       | 6.5            | 1.776             | 1.796             |
|       | 16.5           | 1.0                 | 31.3                | 0.8                    | 3.0                  | 48.1                 |       | 7.5            | 1.802             | 1.747             |
|       | 18.5           | 1.0                 | 36.6                | 0.5                    | 3.2                  | 54.1                 |       | 8.5            | 1.616             | 1.69              |
|       | 20.5           | 0.6                 | 36.7                | 0.4                    | 4.0                  | 68.7                 |       | 9.5            | 1.525             | 1.432             |
|       | 25.5           | 0.5                 | 37.8                | 0.2                    | 3.8                  | 68.7                 |       | 10.5           | 1.399             | 1.472             |
| E102  | 0.5            | 9.0                 | 1.1                 | 0.8                    | 0.8                  | 0.0                  | 11.5  | 1.386          | 1.464             |                   |
|       | 1.5            | 6.4                 | 9.2                 | 1.8                    | 10.9                 | 45.2                 | 12.5  | 1.373          | 1.458             |                   |
|       | 2.5            | 2.5                 | 27.2                | 2.6                    | 10.5                 | 83.6                 | 13.5  | 1.361          | 1.296             |                   |
|       | 4.5            | 1.7                 | 41.3                | 1.2                    | 8.8                  | 79.1                 | 14.5  | 1.261          | 1.221             |                   |
|       | 6.5            | 0.9                 | 46.2                | 1.2                    | 11.3                 | 112.9                | 15.5  | 1.257          | 1.237             |                   |
|       | 8.5            | 1.3                 | 40.2                | 2.2                    | 12.6                 | 113.0                | 16.5  | 1.042          | 1.146             |                   |
|       | 10.5           | 0.7                 | 39.1                | 1.8                    | 16.2                 | 102.1                | 17.5  | 1.24           | 1.24              |                   |
|       | 12.5           | 2.0                 | 24.7                | 3.0                    | 7.3                  | 37.9                 | 18.5  | 1.109          | 1.196             |                   |
|       | 14.5           | 0.6                 | 36.3                | 2.4                    | 6.1                  | 60.7                 | 19.5  | 1.212          | 1.208             |                   |
|       | 16.5           | 0.8                 | 36.5                | 2.6                    | 5.1                  | 43.8                 |       |                |                   |                   |
|       | 18.5           | 0.7                 | 41.8                | 1.5                    | 5.6                  | 55.2                 |       |                |                   |                   |
|       | 20.5           | 0.5                 | 44.9                | 0.4                    | 5.3                  | 64.4                 |       |                |                   |                   |
|       | 25.5           | 0.7                 | 47.5                | 1.1                    | 4.7                  | 81.3                 |       |                |                   |                   |
| E104  | 0.5            | 9.3                 | 1.9                 | 0.8                    | 0.9                  | 0.0                  |       |                |                   |                   |
|       | 1.5            | 8.6                 | 5.3                 | 1.8                    | 2.7                  | 10.1                 |       |                |                   |                   |
|       | 2.5            | 4.0                 | 12.7                | 1.8                    | 3.6                  | 17.4                 |       |                |                   |                   |
|       | 4.5            | 0.4                 | 40.1                | 1.0                    | 4.6                  | 67.7                 |       |                |                   |                   |
|       | 6.5            | 0.7                 | 37.4                | 2.3                    | 5.2                  | 56.1                 |       |                |                   |                   |
|       | 8.5            | 0.5                 | 35.0                | 3.3                    | 6.1                  | 37.7                 |       |                |                   |                   |
|       | 10.5           | 0.6                 | 38.2                | 4.2                    | 6.8                  | 39.4                 |       |                |                   |                   |
|       | 12.5           | 0.7                 | 35.8                | 3.9                    | 8.7                  | 40.6                 |       |                |                   |                   |
|       | 14.5           | 0.5                 | 37.3                | 3.9                    | 9.0                  | 35.4                 |       |                |                   |                   |
|       | 16.5           | 0.5                 | 39.4                | 4.2                    | 9.7                  | 20.7                 |       |                |                   |                   |
|       | 18.5           | 0.5                 | 39.7                | 4.7                    | 6.2                  | 30.7                 |       |                |                   |                   |
|       | 20.5           | 0.3                 | 40.6                | 3.4                    | 4.5                  | 33.0                 |       |                |                   |                   |
|       | 25.5           | 0.7                 | 45.1                | 4.1                    | 3.5                  | 40.3                 |       |                |                   |                   |
| 30.5  | 0.6            | 47.0                | 3.9                 |                        |                      |                      |       |                |                   |                   |

Table S9. Measured downcore concentration profiles used to inform the data-model fitting at site B14 (cruise JR16006 – July 2017).

| Event | Depth<br>cmbsf | Porewater           |                     |                        |                      |                      | Event     | Depth<br>cmbsf | Sediment          |                   |
|-------|----------------|---------------------|---------------------|------------------------|----------------------|----------------------|-----------|----------------|-------------------|-------------------|
|       |                | $NO_3^-$<br>$\mu M$ | $NH_4^+$<br>$\mu M$ | $PO_4^{3-}$<br>$\mu M$ | $Mn^{2+}$<br>$\mu M$ | $Fe^{2+}$<br>$\mu M$ |           |                | $TOC (R1)$<br>wt% | $TOC (R2)$<br>wt% |
| E292  | 0.5            | 13.9                | 3.3                 | 1.5                    | 15.4                 |                      | 0.25      | 2.5            | 2.5               |                   |
|       | 1.5            | 4.6                 | 10.3                | 1.2                    | 16.9                 |                      | 0.75      | 2.3            | 2.4               |                   |
|       | 2.5            | 2.4                 | 23.3                | 2.4                    | 0.0                  |                      | 1.25      | 2.4            | 2.4               |                   |
|       | 4.5            | 2.9                 | 22.9                | 1.8                    | 0.0                  |                      | 1.75      | 2.3            | 2.4               |                   |
|       | 6.5            | 1.7                 | 28.2                | 1.6                    | 1.4                  |                      | 2.5       | 2.4            |                   |                   |
|       | 8.5            | 1.6                 | 24.2                | 1.6                    | 2.8                  |                      | 3.5       | 2.4            | 2.4               |                   |
|       | 10.5           | 1.5                 | 22.2                | 1.2                    | 2.5                  |                      | 4.5       | 2.3            | 2.2               |                   |
|       | 12.5           | 1.7                 | 19.4                | 1.5                    | 2.5                  |                      | 5.5       | 2.4            | 2.3               |                   |
|       | 14.5           | 1.5                 | 19.8                | 1.9                    | 4.6                  |                      | 6.5       | 2.2            | 2.1               |                   |
|       | 16.5           | 1.5                 | 19.9                | 2.4                    | 2.7                  |                      | 7.5       | 2.2            | 2.2               |                   |
|       | 18.5           | 1.6                 | 26.2                | 3.1                    | 2.2                  |                      | 8.5       | 2.2            | 2.2               |                   |
|       | 20.5           | 2.0                 | 33.2                | 3.8                    | 1.8                  |                      | 9.5       | 2.0            | 2.0               |                   |
|       | 25.5           | 2.0                 | 44.0                | 6.4                    | 1.4                  |                      | 10.5      | 2.1            | 2.0               |                   |
|       | 30.5           | 2.2                 | 48.7                | 7.3                    | 1.0                  |                      | 11.5      | 2.1            | 2.2               |                   |
| E294  | 0.5            | 12.0                | 3.3                 | 1.0                    | 3.2                  | 0.0                  | 13.5      | 2.0            | 2.0               |                   |
|       | 1.5            | 6.1                 | 14.4                | 1.5                    | 49.1                 | 32.3                 | 14.5      | 2.0            | 2.0               |                   |
|       | 2.5            | 2.4                 | 32.3                | 5.2                    | 26.9                 | 126.6                | E295 15.5 | 1.9            |                   |                   |
|       | 4.5            | 1.8                 | 33.8                | 5.7                    | 15.5                 | 125.2                | 16.5      | 2.2            | 1.9               |                   |
|       | 6.5            | 1.4                 | 37.3                | 6.2                    | 10.1                 | 122.8                | 17.5      | 1.9            | 1.8               |                   |
|       | 8.5            | 1.4                 | 38.0                | 5.6                    | 15.6                 | 111.8                | 18.5      | 1.9            | 1.8               |                   |
|       | 10.5           | 1.4                 | 34.1                | 7.2                    | 6.9                  | 99.6                 | 19.5      |                | 1.9               |                   |
|       | 12.5           | 1.6                 | 32.0                | 4.4                    | 6.2                  | 77.5                 | 20.5      | 1.7            | 1.8               |                   |
|       | 14.5           | 1.5                 | 40.9                | 5.2                    | 7.3                  | 105.3                | 21.5      | 1.7            | 1.8               |                   |
|       | 16.5           | 1.3                 | 47.8                | 7.6                    | 7.7                  | 139.1                | 22.5      | 1.7            | 1.7               |                   |
|       | 18.5           | 1.5                 | 49.6                | 6.4                    | 8.8                  | 126.8                | 23.5      | 1.7            | 1.8               |                   |
|       | 20.5           | 1.4                 | 56.9                | 8.1                    | 10.2                 | 128.3                | 24.5      | 1.6            | 1.7               |                   |
|       | 25.5           | 1.6                 | 67.9                | 9.0                    | 10.3                 | 109.9                | 25.5      | 1.7            | 1.7               |                   |
|       | 30.5           | 1.7                 | 66.1                | 9.0                    | 11.1                 | 104.3                | 26.5      | 1.6            | 1.6               |                   |
| E295  | 0.5            | 12.8                | 5.2                 | 1.3                    | 1.9                  | 0.0                  | 27.5      | 1.6            | 1.6               |                   |
|       | 1.5            | 5.3                 | 19.6                | 3.2                    | 31.6                 | 91.8                 | 28.5      | 1.6            | 1.6               |                   |
|       | 2.5            | 2.2                 | 25.6                | 5.2                    | 24.6                 | 108.1                | 29.5      | 1.7            | 1.7               |                   |
|       | 4.5            | 1.6                 | 31.6                | 5.9                    | 9.6                  | 99.8                 | 30.5      | 1.7            | 1.7               |                   |
|       | 6.5            | 1.6                 | 26.2                | 3.4                    | 5.4                  | 62.7                 | 31.5      | 1.6            | 1.6               |                   |
|       | 8.5            | 1.5                 | 25.4                | 3.2                    | 3.1                  | 55.9                 | 32.5      | 1.5            | 1.5               |                   |
|       | 10.5           | 1.7                 | 25.6                | 2.8                    | 2.8                  | 41.6                 |           |                |                   |                   |
|       | 12.5           | 2.1                 | 24.2                | 3.4                    | 3.7                  | 34.0                 |           |                |                   |                   |
|       | 14.5           | 1.6                 | 28.4                | 4.8                    | 2.5                  | 38.2                 |           |                |                   |                   |
|       | 16.5           | 1.6                 | 32.3                | 4.9                    | 2.4                  | 34.8                 |           |                |                   |                   |
|       | 18.5           | 1.5                 | 37.5                | 6.2                    | 3.0                  | 41.9                 |           |                |                   |                   |
|       | 20.5           | 1.7                 | 38.2                | 6.2                    | 2.9                  | 38.7                 |           |                |                   |                   |
|       | 25.5           | 1.5                 | 46.4                | 7.9                    | 3.5                  | 46.3                 |           |                |                   |                   |
|       | 30.5           | 1.5                 | 50.2                | 8.4                    | 3.2                  | 45.2                 |           |                |                   |                   |

Table S10. Measured downcore concentration profiles used to inform the data-model fitting at site B15 (cruise JR16006 – July 2017).

| Event | Depth<br>cmbsf | Porewater           |                     |                        |                      |                      | Event | Sediment       |                   |                   |
|-------|----------------|---------------------|---------------------|------------------------|----------------------|----------------------|-------|----------------|-------------------|-------------------|
|       |                | $NO_3^-$<br>$\mu M$ | $NH_4^+$<br>$\mu M$ | $PO_4^{3-}$<br>$\mu M$ | $Mn^{2+}$<br>$\mu M$ | $Fe^{2+}$<br>$\mu M$ |       | Depth<br>cmbsf | $TOC$ (R1)<br>wt% | $TOC$ (R2)<br>wt% |
| E144  | 0.5            | 12.3                | 0.6                 | 1.8                    | 0.0                  | 0.0                  |       | 0.25           | 1.7               | 1.7               |
|       | 1.5            | 14.0                | 0.3                 | 1.9                    | 0.0                  | 0.0                  |       | 1.25           | 1.7               | 1.8               |
|       | 2.5            | 13.7                | 0.6                 | 2.2                    | 0.0                  | 0.0                  |       | 1.75           | 1.8               | 1.9               |
|       | 4.5            | 7.5                 | 0.2                 | 2.1                    | 5.2                  | 0.0                  |       | 2.5            | 1.8               | 1.8               |
|       | 6.5            | 1.3                 | 1.0                 | 2.3                    | 22.4                 | 0.0                  |       | 3.5            | 1.7               | 1.6               |
|       | 8.5            | 1.9                 | 3.4                 | 3.1                    | 33.8                 | 0.0                  |       | 4.5            | 1.6               | 1.6               |
|       | 10.5           | 1.0                 | 6.9                 | 1.3                    | 43.5                 | 26.5                 |       | 5.5            | 1.5               | 1.6               |
|       | 12.5           | 2.1                 | 7.6                 | 0.8                    | 38.8                 | 49.1                 |       | 6.5            | 1.5               | 1.6               |
|       | 14.5           | 0.7                 | 10.5                | 0.7                    | 40.4                 | 84.0                 |       | 7.5            | 1.4               | 1.4               |
|       | 16.5           | 1.8                 | 13.5                | 0.5                    | 45.4                 | 106.1                |       | 8.5            | 1.4               | 1.5               |
|       | 18.5           | 1.2                 | 10.2                | 0.2                    | 47.1                 | 113.6                |       | 9.5            | 1.4               | 1.4               |
|       | 20.5           | 0.8                 | 22.2                | 0.8                    | 107.6                | 102.5                |       | 10.5           | 1.3               | 1.3               |
|       | 25.5           | 0.6                 | 32.4                | 2.4                    | 99.4                 | 157.2                |       | 11.5           | 1.4               | 1.5               |
|       | 30.5           | 0.5                 | 35.0                | 1.4                    | 106.0                | 168.3                |       | 12.5           | 1.5               | 1.5               |
| E145  |                |                     |                     |                        |                      |                      |       | 13.5           | 1.5               | 1.5               |
|       | 0.5            | 11.0                | 0.2                 | 1.2                    | 0.0                  | 0.0                  |       | 14.5           | 1.5               | 1.4               |
|       | 1.5            | 11.8                | 0.0                 | 1.3                    | 0.0                  | 0.0                  | E144  | 15.5           | 1.5               | 1.5               |
|       | 2.5            | 11.3                | 0.1                 | 1.7                    | 0.0                  | 0.0                  |       | 16.5           | 1.5               | 1.5               |
|       | 4.5            | 8.5                 | 0.1                 | 2.0                    | 10.4                 | 0.0                  |       | 17.5           | 1.5               | 1.4               |
|       | 6.5            | 3.0                 | 1.3                 | 1.8                    | 41.4                 | 0.0                  |       | 18.5           | 1.5               | 1.5               |
|       | 8.5            | 1.7                 | 3.8                 | 1.3                    | 55.4                 | 11.9                 |       | 19.5           | 1.5               | 1.5               |
|       | 10.5           | 0.6                 | 0.5                 |                        | 69.2                 | 22.1                 |       | 20.5           | 1.4               | 1.5               |
|       | 12.5           | 0.5                 | 13.6                |                        | 59.7                 | 35.9                 |       | 21.5           | 1.5               | 1.5               |
|       | 14.5           | 0.9                 | 15.9                |                        | 66.3                 | 48.8                 |       | 22.5           | 1.5               | 1.4               |
|       | 16.5           | 1.0                 | 16.3                |                        | 78.1                 | 83.0                 |       | 23.5           | 1.5               | 1.4               |
|       | 18.5           | 0.5                 | 13.6                |                        | 90.4                 | 105.0                |       | 24.5           | 1.4               | 1.4               |
|       | 20.5           |                     |                     |                        |                      |                      |       | 25.5           | 1.5               | 1.5               |
|       | 25.5           |                     |                     |                        |                      |                      |       | 26.5           | 1.4               | 1.4               |
| 30.5  |                |                     |                     |                        |                      | 27.5                 |       | 1.5            | 1.4               |                   |
|       |                |                     |                     |                        |                      | 28.5                 |       | 1.5            | 1.5               |                   |
|       |                |                     |                     |                        |                      | 29.5                 | 1.4   | 1.5            |                   |                   |
| E146  | 0.5            |                     | 1.7                 | 0.3                    | 0.0                  | 0.0                  |       | 30.5           | 1.5               | 1.4               |
|       | 1.5            | 11.7                | 1.1                 | 0.9                    | 0.0                  | 0.0                  |       | 31.5           | 1.4               | 1.5               |
|       | 2.5            | 13.5                | 3.2                 | 1.2                    | 0.0                  | 0.0                  |       | 32.5           | 1.3               | 1.3               |
|       | 4.5            | 11.5                | 3.2                 | 1.4                    | 22.7                 | 0.0                  |       |                |                   |                   |
|       | 6.5            | 4.5                 | 1.5                 | 1.4                    | 104.7                | 14.9                 |       |                |                   |                   |
|       | 8.5            | 1.7                 | 6.3                 | 1.6                    | 82.2                 | 0.0                  |       |                |                   |                   |
|       | 10.5           | 1.6                 | 9.8                 | 1.7                    | 98.3                 | 0.0                  |       |                |                   |                   |
|       | 12.5           | 1.9                 | 10.0                | 1.8                    | 93.1                 | 0.0                  |       |                |                   |                   |
|       | 14.5           | 0.9                 | 15.0                | 1.5                    | 91.3                 | 0.0                  |       |                |                   |                   |
|       | 16.5           | 0.8                 | 17.8                | 1.1                    | 70.1                 | 192.9                |       |                |                   |                   |
|       | 18.5           | 0.7                 | 14.8                | 0.5                    | 74.4                 | 134.6                |       |                |                   |                   |
|       | 20.5           | 1.2                 | 23.4                | 0.3                    | 74.3                 | 105.8                |       |                |                   |                   |
|       | 22.5           | 1.1                 | 26.6                | 0.1                    |                      |                      |       |                |                   |                   |
|       | 25.5           | 1.2                 | 19.7                | 0.2                    | 75.1                 | 78.2                 |       |                |                   |                   |
| 30.5  | 1.3            | 38.9                | 0.2                 | 75.1                   | 78.2                 |                      |       |                |                   |                   |

Table S11. Measured downcore concentration profiles used to inform the data-model fitting at site B16 (cruise JR16006 – July 2017).

| Event | Depth<br>cmbsf | Porewater           |                     |                        |                      |                      | Event | Depth<br>cmbsf | Sediment          |                   |
|-------|----------------|---------------------|---------------------|------------------------|----------------------|----------------------|-------|----------------|-------------------|-------------------|
|       |                | $NO_3^-$<br>$\mu M$ | $NH_4^+$<br>$\mu M$ | $PO_4^{3-}$<br>$\mu M$ | $Mn^{2+}$<br>$\mu M$ | $Fe^{2+}$<br>$\mu M$ |       |                | $TOC$ (R1)<br>wt% | $TOC$ (R2)<br>wt% |
| E183  | 0.5            | 12.1                | 4.2                 | 1.2                    | 0.0                  | 0.0                  |       | 0.25           |                   |                   |
|       | 1.5            | 10.5                | 3.2                 | 1.6                    | 0.0                  | 0.0                  |       | 0.75           | 1.6               | 1.6               |
|       | 2.5            | 7.1                 | 5.7                 | 1.3                    | 7.1                  | 0.0                  |       | 1.25           |                   |                   |
|       | 4.5            | 2.6                 | 15.8                | 2.2                    | 26.5                 | 77.6                 |       | 1.75           | 1.6               | 1.5               |
|       | 6.5            | 1.7                 | 19.8                | 1.6                    | 31.0                 | 70.2                 |       | 2.5            | 1.4               | 1.4               |
|       | 8.5            | 1.3                 | 19.4                | 1.9                    | 20.5                 | 45.8                 |       | 3.5            | 1.4               | 1.4               |
|       | 10.5           | 1.4                 | 20.6                | 1.7                    | 19.7                 | 51.3                 |       | 4.5            | 1.4               | 1.4               |
|       | 12.5           | 1.7                 | 21.4                | 1.2                    | 17.3                 | 54.4                 |       | 5.5            | 1.3               | 1.3               |
|       | 14.5           | 1.8                 | 21.8                | 0.9                    | 20.1                 | 56.7                 |       | 6.5            |                   |                   |
|       | 16.5           | 2.0                 | 21.6                | 1.0                    | 23.8                 | 60.4                 |       | 7.5            | 1.3               | 1.3               |
|       | 18.5           | 1.7                 | 23.8                | 0.8                    | 22.3                 | 64.7                 |       | 8.5            | 1.2               | 1.3               |
|       | 20.5           | 1.9                 | 26.5                | 0.9                    | 27.1                 | 67.2                 |       | 9.5            | 1.2               | 1.2               |
|       | 25.5           | 1.5                 | 32.9                | 1.1                    | 25.2                 | 97.6                 |       | 10.5           | 1.5               | 1.5               |
|       | 30.5           | 1.4                 | 36.7                | 2.0                    | 23.0                 | 97.6                 |       | 11.5           | 1.1               | 1.2               |
| E184  |                |                     |                     |                        |                      |                      | E183  | 12.5           | 1.1               | 1.1               |
|       | 0.5            | 11.5                | 2.6                 | 0.9                    | 0.0                  | 0.0                  |       | 13.5           | 1.1               | 1.2               |
|       | 1.5            | 9.4                 | 2.7                 | 1.2                    | 1.2                  | 0.0                  |       | 14.5           | 1.1               | 1.1               |
|       | 2.5            | 8.4                 | 4.0                 | 1.4                    | 8.5                  | 0.0                  |       | 15.5           | 1.1               | 1.2               |
|       | 4.5            | 4.4                 | 11.2                | 1.5                    | 27.8                 | 22.0                 |       | 16.5           | 1.1               | 1.1               |
|       | 6.5            | 1.4                 | 23.6                | 1.5                    | 38.4                 | 57.7                 |       | 17.5           | 1.1               | 1.1               |
|       | 8.5            | 1.6                 | 26.1                | 2.0                    | 34.4                 | 69.2                 |       | 18.5           | 1.1               | 1.1               |
|       | 10.5           | 1.5                 | 31.2                | 1.7                    | 28.6                 | 81.5                 |       | 19.5           | 1.1               | 1.1               |
|       | 12.5           | 1.4                 | 29.5                | 1.4                    | 27.3                 | 78.3                 |       | 20.5           |                   | 1.1               |
|       | 14.5           | 2.0                 | 33.7                | 1.3                    | 28.4                 | 87.9                 |       | 21.5           | 1.0               | 0.9               |
|       | 16.5           | 2.1                 | 34.6                | 1.5                    | 27.8                 | 89.7                 |       | 22.5           | 1.1               | 1.1               |
|       | 18.5           | 1.3                 | 37.6                | 1.4                    | 32.9                 | 115.4                |       | 23.5           | 1.0               | 1.0               |
|       | 20.5           | 1.4                 | 33.9                | 0.6                    | 23.7                 | 87.9                 |       | 24.5           | 1.0               | 1.0               |
|       | 25.5           | 1.4                 | 34.6                | 0.7                    | 24.2                 | 81.6                 |       | 25.5           | 1.0               | 1.0               |
|       |                |                     |                     |                        |                      |                      | 26.5  | 1.1            | 1.1               |                   |
| E185  | 0.5            | 12.2                | 5.2                 | 1.1                    | 0.0                  | 0.0                  |       |                |                   |                   |
|       | 1.5            | 8.4                 | 3.9                 | 1.0                    | 0.0                  | 0.0                  |       |                |                   |                   |
|       | 2.5            | 6.4                 | 4.7                 | 1.3                    | 6.2                  | 0.0                  |       |                |                   |                   |
|       | 4.5            | 1.8                 | 25.9                | 1.2                    | 17.4                 | 54.1                 |       |                |                   |                   |
|       | 6.5            | 2.3                 | 14.9                | 1.1                    | 14.9                 | 28.7                 |       |                |                   |                   |
|       | 8.5            | 1.4                 | 19.5                | 0.9                    | 18.8                 | 43.6                 |       |                |                   |                   |
|       | 10.5           | 5.7                 | 24.2                | 1.2                    | 16.0                 | 61.7                 |       |                |                   |                   |
|       | 12.5           | 1.7                 | 29.8                | 1.2                    | 18.5                 | 70.0                 |       |                |                   |                   |
|       | 14.5           | 1.6                 | 29.5                | 0.9                    | 20.0                 | 70.8                 |       |                |                   |                   |
|       | 16.5           | 2.2                 | 30.7                | 1.2                    | 22.4                 | 71.0                 |       |                |                   |                   |
|       | 18.5           | 2.0                 | 33.0                | 1.1                    | 23.2                 | 76.7                 |       |                |                   |                   |
| 20.5  | 1.3            | 39.0                | 0.8                 | 26.0                   | 108.1                |                      |       |                |                   |                   |
| 25.5  | 1.3            | 37.9                | 1.3                 | 27.8                   | 111.6                |                      |       |                |                   |                   |

Table S12. Measured downcore concentration profiles used to inform the data-model fitting at site B17 (cruise JR16006 – July 2017).

| Event | Depth<br>cmbsf | Porewater           |                     |                        |                      |                      | Event | Depth<br>cmbsf | Sediment        |                 |
|-------|----------------|---------------------|---------------------|------------------------|----------------------|----------------------|-------|----------------|-----------------|-----------------|
|       |                | $NO_3^-$<br>$\mu M$ | $NH_4^+$<br>$\mu M$ | $PO_4^{3-}$<br>$\mu M$ | $Mn^{2+}$<br>$\mu M$ | $Fe^{2+}$<br>$\mu M$ |       |                | TOC (R1)<br>wt% | TOC (R2)<br>wt% |
| E223  | 0.5            | 12.1                | 0.4                 | 0.8                    | 0.0                  | 0.0                  |       | 0.3            | 1.6             | 1.7             |
|       | 1.5            | 12.5                | 0.4                 | 2.0                    | 0.0                  | 0.0                  |       | 0.5            | 1.7             | 1.8             |
|       | 2.5            | 3.3                 | 3.9                 | 1.9                    | 65.4                 | 0.0                  |       | 1.3            | 1.6             | 1.7             |
|       | 4.5            | 1.4                 | 16.4                | 3.5                    | 108.1                | 110.4                |       | 1.8            | 1.7             | 1.7             |
|       | 6.5            | 0.8                 | 23.7                | 1.3                    | 118.2                | 182.0                |       | 2.5            | 1.5             | 1.6             |
|       | 8.5            | 1.2                 | 25.3                | 4.3                    | 122.1                | 117.0                |       | 3.5            | 1.4             | 1.5             |
|       | 10.5           | 1.2                 | 34.9                | 3.8                    | 110.7                | 133.5                |       | 4.5            | 1.4             | 1.4             |
|       | 12.5           | 1.3                 | 33.4                | 3.3                    | 97.9                 | 196.1                |       | 5.5            | 1.2             | 1.3             |
|       | 14.5           | 0.8                 | 32.5                | 1.7                    | 77.3                 | 152.8                |       | 6.5            | 1.1             | 1.2             |
|       | 16.5           | 0.9                 | 35.0                | 7.8                    | 80.5                 | 169.4                |       | 7.5            | 1.1             | 1.2             |
|       | 18.5           | 0.8                 | 34.8                | 2.1                    | 75.6                 | 150.8                |       | 8.5            | 1.1             | 1.1             |
|       | 20.5           | 1.1                 | 33.3                | 2.4                    | 72.0                 | 126.0                |       | 9.5            | 1.0             | 1.1             |
|       | 25.5           | 1.8                 | 35.6                | 1.5                    | 68.9                 | 99.6                 |       | 10.5           | 1.1             | 1.0             |
|       | 30.5           | 0.3                 | 14.0                | 0.3                    | 53.4                 | 125.3                |       | 11.5           | 1.0             | 1.0             |
| E225  |                |                     |                     |                        |                      |                      |       | 12.5           | 1.0             | 0.9             |
|       | 0.5            | 11.6                | 1.4                 | 1.0                    | 0.0                  | 0.0                  |       | 13.5           | 1.0             | 1.0             |
|       | 1.5            | 9.8                 | 0.5                 | 1.7                    | 0.0                  | 0.0                  |       | 14.5           | 1.1             | 1.0             |
|       | 2.5            | 6.3                 | 2.8                 | 1.6                    | 35.9                 | 0.0                  | E226  | 15.5           | 1.1             | 1.2             |
|       | 4.5            | 0.8                 | 21.5                | 2.8                    | 102.2                | 184.1                |       | 16.5           | 1.1             |                 |
|       | 6.5            | 0.7                 | 29.4                | 6.2                    | 107.0                | 189.4                |       | 17.5           | 1.0             | 1.1             |
|       | 8.5            | 1.0                 | 30.1                | 3.1                    | 99.8                 | 191.6                |       | 18.5           | 1.0             | 1.1             |
|       | 10.5           | 0.7                 | 35.1                | 5.6                    | 87.2                 | 211.9                |       | 19.5           | 1.0             | 1.0             |
|       | 12.5           | 1.2                 | 40.4                | 2.2                    | 79.8                 | 212.6                |       | 20.5           | 0.9             | 0.9             |
|       | 14.5           | 0.9                 | 41.5                | 3.7                    | 80.4                 | 200.5                |       | 21.5           | 0.8             | 0.9             |
|       | 16.5           | 1.5                 | 42.7                | 2.7                    | 75.1                 | 192.8                |       | 22.5           | 0.9             | 0.9             |
|       | 18.5           | 0.9                 | 47.0                | 3.6                    | 69.7                 | 185.8                |       | 23.5           | 0.9             | 0.9             |
|       | 20.5           | 0.9                 | 59.8                | 4.1                    | 66.1                 | 183.6                |       | 24.5           | 0.9             | 0.9             |
|       | 25.5           | 0.8                 | 51.2                | 4.5                    | 63.4                 | 172.2                |       | 25.5           | 0.9             | 0.9             |
| 30.5  | 1.0            | 50.9                | 3.8                 | 62.4                   | 158.8                |                      | 26.5  | 0.9            | 0.9             |                 |
| E226  |                |                     |                     |                        |                      |                      |       | 27.5           | 0.9             | 0.9             |
|       | 0.5            | 11.3                | 0.0                 | 0.6                    | 0.0                  | 0.0                  |       | 28.5           | 0.8             | 0.8             |
|       | 1.5            | 14.0                | 2.3                 | 1.2                    | 3.0                  | 0.0                  |       | 29.5           | 0.8             | 0.8             |
|       | 2.5            | 4.7                 | 11.8                | 1.3                    | 54.8                 | 0.0                  |       | 30.5           | 0.8             | 0.8             |
|       | 4.5            | 1.1                 | 18.4                | 2.5                    | 180.0                | 57.5                 |       | 31.5           | 0.7             | 0.7             |
|       | 6.5            | 0.9                 | 32.1                | 5.6                    | 151.4                | 187.5                |       | 32.5           | 0.7             | 0.8             |
|       | 8.5            | 1.0                 | 34.5                | 5.0                    | 137.3                | 198.6                |       | 33.5           | 0.8             | 0.8             |
|       | 10.5           | 1.2                 | 35.4                | 5.9                    | 120.9                | 164.3                |       |                |                 |                 |
|       | 12.5           | 1.3                 | 43.0                | 2.3                    | 98.8                 | 224.1                |       |                |                 |                 |
|       | 14.5           | 1.0                 | 45.3                | 3.6                    | 96.2                 | 208.5                |       |                |                 |                 |
|       | 16.5           | 0.8                 | 39.7                | 1.9                    | 96.4                 | 211.7                |       |                |                 |                 |
|       | 18.5           | 1.0                 | 49.0                | 4.3                    | 91.4                 | 198.8                |       |                |                 |                 |
|       | 20.5           | 0.8                 | 48.6                | 2.7                    | 83.5                 | 207.1                |       |                |                 |                 |
|       | 25.5           | 1.0                 | 46.6                | 2.7                    | 75.6                 | 175.0                |       |                |                 |                 |
| 30.5  | 1.0            | 59.6                | 2.7                 | 68.6                   | 152.3                |                      |       |                |                 |                 |

## References

1. Aguilera DR, Jourabchi P, Spiteri C, Regnier P. 2005 A knowledge-based reactive transport approach for the simulation of biogeochemical dynamics in Earth systems. *Geochem. Geophys. Geosystems* **6**, 1–18. (doi:10.1029/2004GC000899)
2. Thullner M, Dale AW, Regnier P. 2009 Global-scale quantification of mineralization pathways in marine sediments: A reaction-transport modeling approach. *Geochem. Geophys. Geosystems* **10**, 1–24. (doi:10.1029/2009GC002484)
3. Van Cappellen P, Wang Y. 1996 Cycling of iron and manganese in surface sediments; a general theory for the coupled transport and reaction of carbon, oxygen, nitrogen, sulfur, iron, and manganese. *Am. J. Sci.* **296**, 197–243. (doi:10.2475/ajs.296.3.197)
4. Boudreau BP, Ruddick BR. 1991 On a reactive continuum representation of organic matter diagenesis. *Am. J. Sci.* **291**, 507–538. (doi:10.2475/ajs.291.5.507)
5. Mogollón JM, Dale AW, Fossing H, Regnier P. 2012 Timescales for the development of methanogenesis and free gas layers in recently-deposited sediments of Arkona Basin (Baltic Sea). *Biogeosciences* **9**, 1915–1933. (doi:10.5194/bg-9-1915-2012)
6. Solan M, Ward ER, Wood CL, Reed AJ, Grange LJ, Godbold JA. In press. Benthic biodiversity-function relations transition across the Barents Sea Polar Front. *Phil. Trans. R. Soc. A*.
7. Zaborska A, Carroll J, Papucci C, Torricelli L, Carroll ML, Walkusz-Miotk J, Pempkowiak J. 2008 Recent sediment accumulation rates for the Western margin of the Barents Sea. *Deep Sea Res. Part II Top. Stud. Oceanogr.* **55**, 2352–2360. (doi:10.1016/j.dsr2.2008.05.026)
8. Dumont E, Brand T, Hopkins J. 2019 CTD data from NERC Changing Arctic Ocean Cruise JR16006 on the RRS James Clark Ross, Jun-August 2017. (doi:doi:10.5285/89a3a6b8-7223-0b9c-e053-6c86abc0f15d)
9. Barnes DKA. 2019 Changing Arctic Ocean Seafloor JR18006 Cruise Report. , 106.
